# Supplementary material
Source: publisher site journal article supplement (https://www.dovepress.com/article/281450)
Supplement: Supplementary file 1 [file get_supplementary_file.php]

**Supplemental Table S1. Primers for Real time qRT-PCR.**

| Gene | Forward primer (5’-3’) | Reverse primer (5’-3’) |
| --- | --- | --- |
| *GADD45B* | TACGAGTCGGCCAAGTTGATG | GGATGAGCGTGAAGTGGATTT |
| *E-cadherin* | AGCCCCGCCTTATGATTCTCTG | TGCCCCATTCGTTCAAGTAGTCAT |
| *N-cadherin* | GATGAAACGCCGGGATAAAGAAC | GCTGCAGCTGGCTCAAGTCATAG |
| *Vimentin* | TTGAACGCAAAGTGGAATC | AGGTCAGGCTTGGAAACA |
| *β-actin* | GCCAACACAGTGCTGTCTGG | GCTCAGGAGGAGCAATGATCTTG |
